# Supplementary material
Source: PubMed Central journal article supplement (PMC7088468)
Supplement: NIHMS1558542-supplement-2.pdf [file NIHMS1558542-supplement-2.pdf]

Supplemental Table 1: Disease classification of underlying cause of death.

These ICD-10 codes were evaluated to help establish the common etiologies of death in each group.

| ICD10   | Disease Classification*                                                                             |
|---------|-----------------------------------------------------------------------------------------------------|
| A00-B99 | Certain infectious and parasitic diseases                                                           |
| C00-D48 | Neoplasms                                                                                           |
| D50-D89 | Diseases of the blood and blood-forming organs and certain disorders involving the immune mechanism |
| E00-E90 | Endocrine, nutritional and metabolic diseases                                                       |
| F00-F99 | Mental and behavioral disorders                                                                     |
| G00-G99 | Diseases of the nervous system                                                                      |
| H00-H59 | Diseases of the eye and adnexa                                                                      |
| H60-H95 | Diseases of the ear and mastoid process                                                             |
| I00-I99 | Diseases of the circulatory system                                                                  |
| J00-J99 | Diseases of the respiratory system                                                                  |
| K00-K93 | Diseases of the digestive system                                                                    |
| L00-L99 | Diseases of the skin and subcutaneous tissue                                                        |
| M00-M99 | Diseases of the musculoskeletal system and connective tissue                                        |
| N00-N99 | Diseases of the genitourinary system                                                                |
| O00-O99 | Pregnancy, childbirth and the puerperium                                                            |
| P00-P96 | Certain conditions originating in the perinatal period                                              |
| Q00-Q99 | Congenital malformations, deformations and chromosomal abnormalities                                |
| R00-R99 | Symptoms, signs and abnormal clinical and laboratory findings, not elsewhere classified             |
| S00-T98 | Injury, poisoning and certain other consequences of external causes                                 |
| V01-Y98 | External causes of morbidity and mortality                                                          |
| Z00-Z99 | Factors influencing health status and contact with health services                                  |
| U00-U99 | Codes for special purposes                                                                          |

\* Obtained from: <http://apps.who.int/classifications/icd10/browse/2010/en#/XIX>

Supplemental Table 2: Age and Follow-up of Cohorts:

Figures reported here give the average ages in years for each grouping – all women, women who died and those that did not. These groups are then sub-divided into those who were designated as fertile, subfertile and ART. In the lower part of the table they are compared similarly as above except those deaths as a result of external causes have been removed. One notes that the average age is younger in all the fertile groups and the length of follow up is similar in each group.

|                                                                  | All Women     |               |               | Women who died |               |               | Women who did not die |               |               |
|------------------------------------------------------------------|---------------|---------------|---------------|----------------|---------------|---------------|-----------------------|---------------|---------------|
| Characteristics                                                  | ART           | Subfertile    | Fertile       | ART            | Subfertile    | Fertile       | ART                   | Subfertile    | Fertile       |
| <b>ALL DEATHS</b>                                                |               |               |               |                |               |               |                       |               |               |
| <b>N</b>                                                         | 16,429        | 11,696        | 455,422       | 21             | 18            | 1,280         | 16,408                | 11,678        | 454,142       |
| Age at end of follow up (mean years $\pm$ SD)                    | 42.4 (5.5)    | 41.2 (5.5)    | 36.5 (6.7)    | 46.6 (4.5)     | 42.5 (6.2)    | 37.5 (7.2)    | 42.4 (5.5)            | 41.2 (5.5)    | 36.5 (6.7)    |
| Follow-up (Median duration in years, Q1-Q3)**                    | 5.7 (3.6–8.4) | 5.6 (3.5–8.4) | 6.0 (3.8–8.6) | 2.8 (1.1–4.7)  | 3.3 (1.7–6.6) | 4.0 (2.0–6.5) | 5.7 (3.6–8.4)         | 5.6 (3.5–8.4) | 6.1 (3.8–8.6) |
| Total women-years                                                | 99,331        | 70,461        | 2,865,459     | 66             | 72            | 5,542         | 99,265                | 70,389        | 2,859,917     |
| <b>DEATHS EXCLUDING EXTERNAL CAUSES OF MORTALITY<sup>†</sup></b> |               |               |               |                |               |               |                       |               |               |
| <b>N</b>                                                         | 16427         | 11690         | 454,875       | 19             | 12            | 733           | 16,408                | 11,678        | 454,142       |
| Age at end of follow up (mean years $\pm$ SD)                    | 42.4 (5.5)    | 41.2 (5.5)    | 36.5 (6.7)    | 46.8(4.7)      | 42.6 (6.2)    | 39.8 (6.9)    | 42.4 (5.5)            | 41.2 (5.5)    | 36.5 (6.7)    |
| Follow-up (Median duration in years, Q1-Q3)**                    | 5.7 (3.6–8.4) | 5.6 (3.5–8.4) | 6.0 (3.8–8.6) | 2.8 (1.1–4.7)  | 4.2 (1–6.8)   | 4.3 (2.2–6.8) | 5.7 (3.6–8.4)         | 5.6 (3.5–8.4) | 6.1 (3.8–8.6) |
| Total women-years                                                | 99,331        | 70,461        | 2,865,459     | 59             | 49            | 3,300         | 99,265                | 70,389        | 2,859,917     |

<sup>†</sup> Excludes women who died from Injuries, external causes of mortality (includes opioids, accidents and injuries)

\*\*Q1-Q3: Quartiles, Q1 is the 25<sup>th</sup> quartile and Q3 is the 75<sup>th</sup> quartile
